# Supplementary material for: MiR-146a and miR-196a-2 polymorphisms are associated with hepatitis virus-related hepatocellular cancer risk: a meta-analysis
Source: PubMed Central journal article supplement (PMC5361670; doi:10.18632/aging.101160), 2017-01-31
Supplement: aging-09-381-s001.pdf [file aging-09-381-s001.pdf]

**SUPPLEMENTARY MATERIAL**

**Table S1. Genotype distributions and allele frequencies of miR-146a and miR-196a-2 polymorphisms in cases and controls.**

| Study                 | Genotype (N) |     |     |         |     |     | Allele Frequency (N) |      |         |      | P of HWE |
|-----------------------|--------------|-----|-----|---------|-----|-----|----------------------|------|---------|------|----------|
|                       | Case         |     |     | Control |     |     | Case                 |      | Control |      |          |
| miR-146a rs2910164    | CC           | CG  | GG  | CC      | CG  | GG  | C                    | G    | C       | G    |          |
| Zhou 2014             | 49           | 107 | 28  | 97      | 154 | 30  | 205                  | 163  | 328     | 214  | 0.02     |
| Cong 2014             | 46           | 39  | 19  | 117     | 84  | 17  | 131                  | 77   | 318     | 118  | 0.84     |
| Zhang 2013            | 257          | 390 | 124 | 367     | 475 | 156 | 904                  | 638  | 1209    | 787  | 0.91     |
| Shan 2013             | 33           | 25  | 13  | 78      | 71  | 36  | 91                   | 51   | 227     | 143  | 0.08     |
| Xiang 2012            | 21           | 34  | 18  | 33      | 46  | 21  | 98                   | 120  | 112     | 88   | 0.5      |
| Kim 2012              | 43           | 71  | 13  | 74      | 103 | 24  | 157                  | 97   | 251     | 151  | 0.19     |
| Wang 2011             | 58           | 103 | 38  | 138     | 185 | 61  | 219                  | 179  | 461     | 307  | 0.94     |
| Akkız 2011            | 8            | 67  | 113 | 11      | 67  | 144 | 83                   | 293  | 89      | 355  | 0.4      |
| miR-196a-2 rs11614913 | CC           | CT  | TT  | CC      | CT  | TT  | C                    | T    | C       | T    |          |
| Yan 2015              | 63           | 113 | 51  | 88      | 136 | 63  | 239                  | 215  | 312     | 262  | 0.41     |
| Zhou 2014             | 67           | 97  | 20  | 66      | 160 | 55  | 231                  | 137  | 292     | 270  | 0.06     |
| Kou 2014              | 72           | 111 | 25  | 125     | 304 | 103 | 255                  | 161  | 554     | 510  | 0.004    |
| Hao 2013              | 58           | 90  | 21  | 67      | 160 | 55  | 206                  | 132  | 294     | 270  | 0.07     |
| Zhang 2013            | 171          | 376 | 224 | 165     | 502 | 328 | 718                  | 823  | 832     | 1158 | 0.24     |
| Han 2013              | 207          | 505 | 305 | 220     | 485 | 304 | 919                  | 1115 | 925     | 1093 | 0.31     |
| Kim 2012              | 24           | 70  | 33  | 45      | 107 | 49  | 118                  | 136  | 197     | 205  | 0.36     |
| Akkız 2011            | 64           | 70  | 19  | 58      | 87  | 40  | 198                  | 108  | 203     | 167  | 0.49     |
| Qi 2010               | 82           | 179 | 100 | 92      | 197 | 102 | 343                  | 379  | 381     | 401  | 0.88     |

HWE: Hardy-Weinberg equilibrium

**Table S2. Egger's test result of the two SNPs and hepatitis virus-related HCC risk based on allele frequency.**

| SNP                         | Std. Eff. | Coefficient | Std. Err. | t     | P           | 95% CI     |
|-----------------------------|-----------|-------------|-----------|-------|-------------|------------|
| miR-146a C>G (rs2910164)    | Slope     | 0.05        | 0.16      | 0.32  | 0.76        | -0.34-0.44 |
|                             | Bias      | 0.63        | 1.23      | 0.51  | <b>0.63</b> | -2.39-3.64 |
| miR-196a-2 C>T (rs11614913) | Slope     | 0.07        | 0.19      | 0.38  | 0.72        | -0.38-0.52 |
|                             | Bias      | -2.05       | 1.88      | -1.09 | <b>0.31</b> | -6.50-2.41 |

Std. Eff.: standardized effect; Std. Err.: standard error; CI: confidence interval

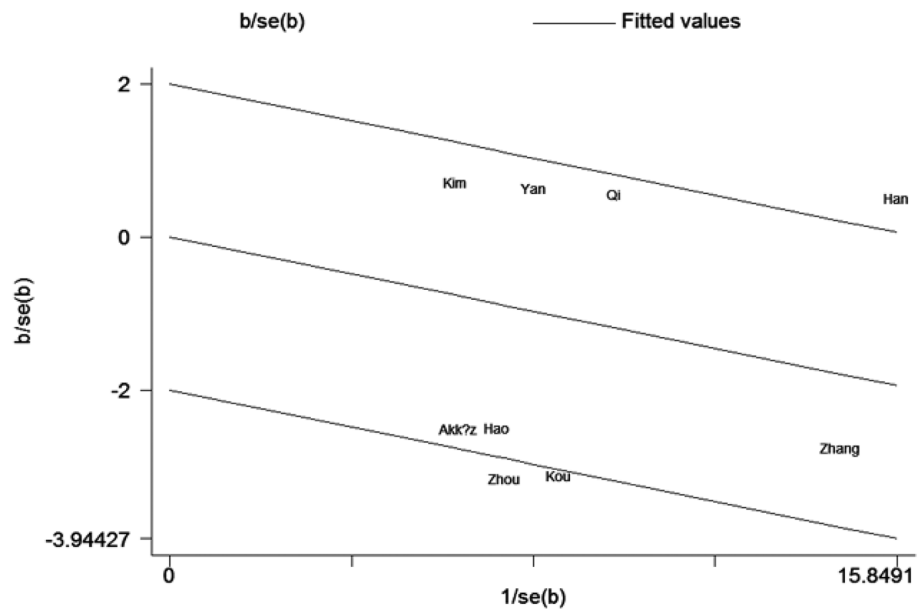

**Supplementary Figure S1.** Galbraith plots of miR-196a-2 rs11614913 and hepatitis virus-related HCC risk (under T vs. C).
